# Supplementary material for: Empirical prediction for travel distance of channelized rock avalanches in the Wenchuan earthquake area
Source: Copernicus journal article supplement (doi:10.5194/nhess-17-833-2017), 2017-06-08
Supplement: Supplementary file 1 [file nhess-17-833-2017-supplement.zip]

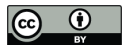

## *Supplement of*

# **Empirical prediction for travel distance of channelized rock avalanches in the Wenchuan earthquake area**

**Weiwei Zhan et al.**

*Correspondence to:* Xuanmei Fan (fxm\_cdut@qq.com)

- [nhess-17-833-2017-supplement-title-page.pdf](#)
- [nhess-2016-372.xlsx](#)

The copyright of individual parts of the supplement might differ from the CC BY 3.0 License.
